# Supplementary material for: RNA Interference-Mediated Suppression of Ecdysone Signaling Inhibits Choriogenesis in Two Coleoptera Species
Source: MDPI journal article supplement (doi:10.3390/ijms25084555), 2024-04-22
Supplement: s1 [file s1]

Supplementary data

# **RNA Interference-Mediated Suppression of Ecdysone Signaling Inhibits Choriogenesis in two Coleoptera species**

Xiao-Qing Zhang <sup>1</sup>, Lin Jin <sup>1</sup>, Kai-Yun Fu <sup>2,3</sup>, Wen-Chao Guo <sup>2,3</sup>, Guo-Qing Li <sup>1</sup> \*

1 Education Ministry Key Laboratory of Integrated Management of Crop Diseases and Pests/ State & Local Joint Engineering Research Center of Green Pesticide Invention and Application, Department of Entomology, College of Plant Protection, Nanjing Agricultural University, China

2 Key Laboratory of Intergraded Pest Management on Crops in Northwestern Oasis, Ministry of Agriculture, China

3 Xinjiang Key Laboratory of Agricultural Biosafety, Institute of Plant Protection, Xinjiang Academy of Agricultural Sciences, Urumqi, China

**Table S1. Primers used in RT-PCR, dsRNA synthesis and qPCR**

| Fragment name          | Forward primer           | Reverse primer           |
|------------------------|--------------------------|--------------------------|
| <b>dsRNA synthesis</b> |                          |                          |
| <i>dsHvEcR</i>         | ACAAAGTGATGTCAGATTTAG    | GCATTATCTACTTTTCATGTAA   |
| <i>dsHvusp</i>         | CTTATCCACCCAACCATC       | CTTCTCTTTTCATACCCATC     |
| <i>dsLdEcR</i>         | GCAGCATGGACATCAAACAC     | GCACTTACACTAATGGCTCCC    |
| <i>dsLdusp</i>         | AATCAATAAGTCCACCGC       | CCAGACACTTCAAACCGA       |
| <i>dsegrp</i>          | AAGTTCAGCGTGTCGG         | CACCTTGATGCCGTTT         |
| <b>qPCR</b>            |                          |                          |
| <i>qLdEcR</i>          | GAATGAGGGCAGAGTGTGTG     | TCGTAGTGCTATTGGGCTTG     |
| <i>qLdEcRA</i>         | CGGGTTCAATAACAGTGTCG     | ATAAGGTTGCGAAGGTGGTC     |
| <i>qLdEcRB1</i>        | GGGAGTGCTAGTGTGTGGA      | GGATTAGACGCTCCCTACGA     |
| <i>qLdusp</i>          | GTACTGGCATCTGTTTCTTTGTCG | CAAGAAGAACGGCAAAGGACGA   |
| <i>qLdUAP1</i>         | AGAGCTGGAGGCGTAGTTGT     | TTTGATTGTTTCGGATTGGA     |
| <i>qLdChS1</i>         | TTGGAACCATAGCTCACATCTT   | AATCTCCACTGCCTGCTTATC    |
| <i>qLdChS2</i>         | AGACTTCTGGTGTTGCTCTTC    | GTAGGCGCATTTCGTCTTAT     |
| <i>qLdRP18</i>         | TAGAATCCTCAAAGCAGGTGGCGA | AGCTGGACCAAAGTGTTTCACTGC |
| <i>qLdRP4</i>          | AAAGAAACGAGCATTGCCCTTCCG | TTGTCGCTGACACTGTAGGGTTGA |
| <i>qHvEcR</i>          | AGAAGAAAAGCCTAGGTCCGG    | GTCCCATATCTCGGCCAAGA     |
| <i>qHvEcRA</i>         | GCGTAGATGGACGGGTATGC     | AACGTCGCAGACGAAGATGT     |
| <i>qHvEcRB1</i>        | GCAGCTCCAATCTCAATGGT     | GAATTCGCGTTCTGGTTGTT     |
| <i>qHvusp</i>          | GGATGCATCAGAGGTGGAGT     | AAACTTGGTCACACACTGGC     |
| <i>qHvUAP</i>          | CACAGCTAAGCGCGACATTC     | CTCCAGTTCTTCGCCACTGT     |
| <i>qHvChS1</i>         | CTGTTCGATCCAACCGGACAT    | CTTCGGCTAGTGGTCCAAGG     |
| <i>qHvChS2</i>         | TTGGCTGCAAAAAGCGACTG     | GATGTCTAGCTTCGGACGCA     |
| <i>qHvRPS18</i>        | CGCAATCAAAGGTGTTGGAAG    | GCCTAGGGTTGGCCATAATAG    |
| <i>qHvRPL13</i>        | AGCATCCTTCGCTCGTTTAG     | TTCGACAACCTGCCATTAGG     |
